# Supplementary material
Source: PubMed Central journal article supplement (PMC4021491)
Supplement: NIHMS576629-supplement-supplement_1.pdf [file NIHMS576629-supplement-supplement_1.pdf]

## SUPPLEMENTARY ONLINE DATA

**Fratxin-bypassing Isu1: characterization of the bypass activity in cells and mitochondria**Heeyong YOON\*, Simon A. B. KNIGHT\*, Alok PANDEY†, Jayashree PAIN†, Yan ZHANG\*, Debkumar PAIN† and Andrew DANCIS\*<sup>1</sup>

\*Division of Hematology-Oncology, Department of Medicine, Perelman School of Medicine, University of Pennsylvania, Philadelphia, PA 19104, U.S.A.

†Department of Pharmacology and Physiology, New Jersey Medical School, Rutgers University, Newark, NJ 07101, U.S.A.

**MATERIALS AND METHODS****Levels of mitochondrial proteins**

Serial dilutions of purified Isu1–His<sub>6</sub> [1] analysed by SDS/PAGE alongside serial dilutions of pure lysozyme as a standard. The gel was stained with Coomassie Blue and Isu1–His<sub>6</sub> amounts were determined by scanning at 700 nm using a LiCor Odyssey and comparing the integrated intensity to the lysozyme standard curve. Mitochondria (10–100 µg of proteins) from three independent mitochondrial preparations of the wt strain (YFH1 ISU1) were analysed by SDS/PAGE using purified Isu1 as a standard. The gel was blotted and probed with anti-Isu1 antibodies, and the signal was developed with secondary antibody [goat anti-(rabbit IgG)–Alexa Fluor™ 680; Life Technologies] followed by scanning with the LiCor Odyssey infrared scanner. The protein amounts were calculated using the accompanying software and Microsoft Excel. A similar procedure was followed for quantitation of Yfh1, Nfs1 and Isd11 proteins in mitochondria.

**Pulse–chase labelling of Isu1**

Cells were grown in defined medium lacking methionine, restarted into logarithmic phase and allowed to reach a  $D_{600}$  of 1.5. For labelling of each time point 40  $D_{600}$  equivalents of cell culture were concentrated to 1 ml and incubated for 10 min at 30 °C in the presence of 10 µl EasyTagEXPRESS<sup>35</sup>S Protein Labeling mix (11 µCi; PerkinElmer) and 20 µM of a mixture of all amino acids except cysteine and methionine [2]. The labelled cells were recovered and washed once followed by dilution into 20 ml of fresh medium with excess unlabelled methionine and cysteine (0.4 mg/ml). Time points were obtained after chase of 30, 60, 90 and 180 min. Cell pellets were frozen, thawed and subjected to glass bead lysis in buffer containing 50 mM Hepes/KOH (pH 7.5), 150 mM NaCl and protease inhibitors. After brief centrifugation

(20 000 *g* for 3 min) the supernatants were recovered. The lysate thus obtained was adjusted to 0.5 % Triton X-100 and 10 mM imidazole, and the samples were loaded on to 20 µl of Ni-NTA–agarose beads by tumbling for 1 h at 4 °C. After washing the beads with binding buffer containing 30 mM imidazole, samples were eluted with SDS sample buffer, and eluates were analysed on a 13 % SDS reducing gel run at 200 V for 140 min. Proteins were transferred on to nitrocellulose membranes and radioactivity was visualized using the STORM phosphorimager. The specific signal attributed to radiolabelled Isu1–His<sub>6</sub> (14 kDa) was present only in the pCM184-transformed cells.

**Real-time PCR for ISU1 transcript quantitation**

Three separate cultures were prepared for each strain. RNA was extracted by hot phenol buffered at pH 5 [3]. The isolated total RNA was treated with DNase I and cleaned further using an RNAeasy kit (Qiagen). The quality of RNA was assessed by electrophoresis on a formaldehyde gel, and the RNA was quantified using a NanoDrop spectrophotometer. First strand cDNA was synthesized using Superscript II reverse transcriptase (Invitrogen) with random p(dN)<sub>6</sub> primers. Quantitative PCR was performed using an ABI 7500 System with Taqman methodology. Primers and probes were obtained from Life Technologies. The primer parameters were: *ISU1* (YPL135W), amplicon size 101 bp and ABI Assay ID Sc04171412-s1; and *TAF1* (YGR274C), amplicon size 69 bp and ABI Assay ID Sc04128090-s1. Following UNG activation (2 min at 50 °C) and Taq polymerase activation (10 min at 95 °C), the two-step amplification parameters were 40 cycles of denaturation (15 s at 95 °C) and annealing/elongation (1 min at 50 °C).  $C_T$  values were calculated using ABI 7500 System SDS 1.2.3 software with baselines set manually and thresholds set automatically.  $C_T$  values were exported to Excel for comparative  $C_T$  and statistical analysis [4].

<sup>1</sup> To whom correspondence should be addressed (email adancis@mail.med.upenn.edu).

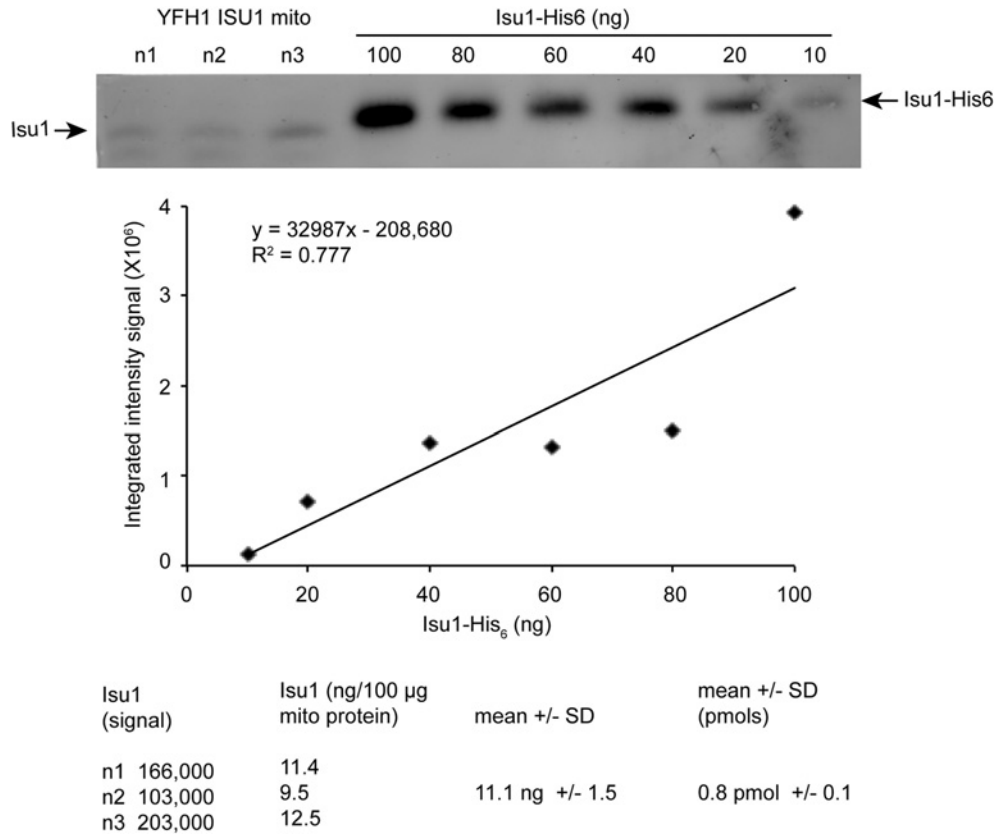

**Figure S1 Measurement of Isu1 levels in mitochondria**

Mitochondria (100 μg of proteins, three independent preparations) from the wt strain (YFH ISU1) were analysed by SDS/PAGE alongside purified Isu1-His<sub>6</sub>. Following transfer on to nitrocellulose membranes, the proteins were immunoblotted with anti-Isu1 polyclonal antibodies followed by a secondary anti-(rabbit IgG)-Alexa Fluor™ 680 antibody. Reactive bands were quantified using a LiCor Odyssey. The standard curve was constructed in Microsoft Excel. The amount of Isu1 present in mitochondria was 11.1 ng or 0.8 pmol per 100 μg of mitochondrial protein.

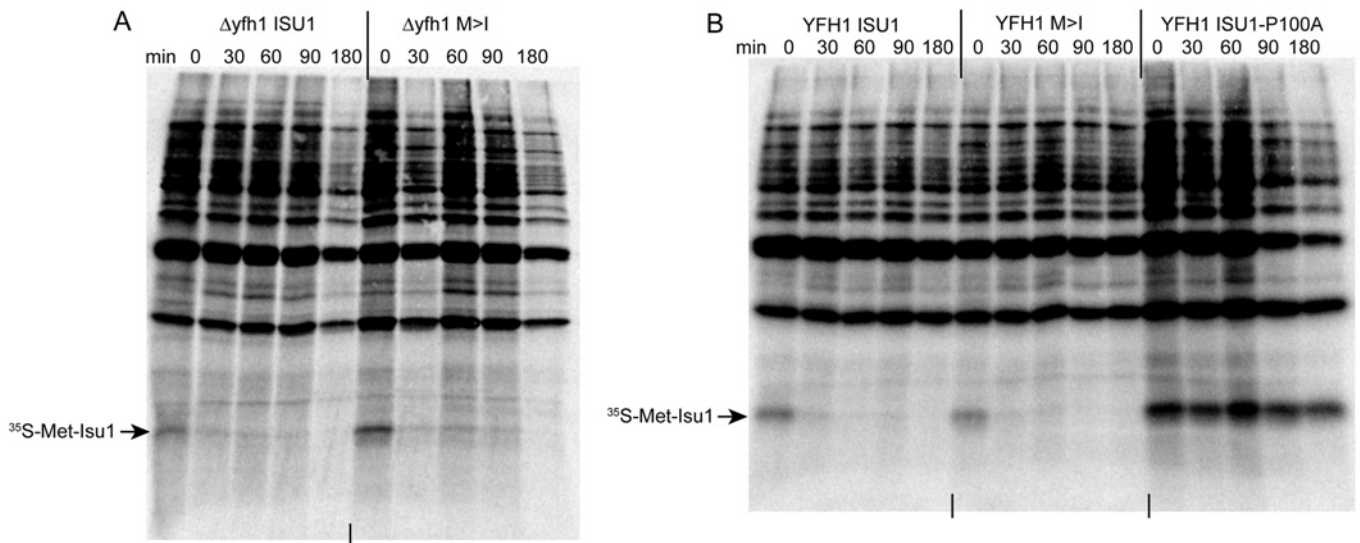

**Figure S2 Pulse-chase labelling of Isu1**

Cells of the indicated genotypes (Δyfh1 ISU1, Δyfh1 M>I, YFH1 ISU1, YFH1 M>I or YFH1 P100A) were grown in medium lacking methionine and incubated with [<sup>35</sup>S]methionine for 10 min (pulse). Cells were diluted into fresh medium with unlabelled methionine and cysteine (0.4 mg/ml) for 0, 30, 60, 90 or 180 min (chase). After cell lysis, the His<sub>6</sub>-tagged forms of Isu1 were recovered on Ni-NTA-agarose beads and visualized by SDS/PAGE and phosphorimager. The P100A substitution of Isu1 exhibited stabilization as described in [1]. Many background bands were observed, but the radiolabelled form of Isu1 was detected in the bottom quarter of the gel indicated by the arrow (<sup>35</sup>S-Met-Isu1).

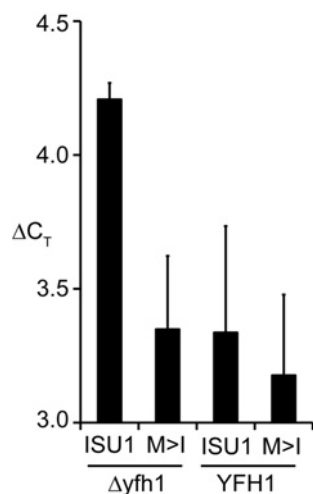

**Figure S3 Real-time PCR for *ISU1* transcript levels**

RNA was prepared from three independent cultures of each strain ( $\Delta yfh1$  ISU1,  $\Delta yfh1$  M>I, YFH1 ISU1 and YFH1 M>I). Quantitative PCR was performed using an ABI 7500 System with Taqman methodology and reagents, and *ISU1*  $\Delta C_T$  was determined for each RNA preparation using *TAF1* (TATA-binding protein-associated factor 1) as an endogenous standard. Results are means  $\pm$  S.D. ( $n = 3$ ).

## REFERENCES

- Pandey, A., Golla, R., Yoon, H., Dancis, A. and Pain, D. (2012) Persulfide formation on mitochondrial cysteine desulfurase: enzyme activation by a eukaryote-specific interacting protein and Fe-S cluster synthesis. *Biochem. J.* **448**, 171–187
- Song, J. Y., Marszalek, J. and Craig, E. A. (2012) Cysteine desulfurase Nfs1 and Pim1 protease control levels of Isu, the Fe-S cluster biogenesis scaffold. *Proc. Natl. Acad. Sci. U.S.A.* **109**, 10370–10375
- Kohrer, K. and Domdey, H. (1991) Preparation of high molecular weight RNA. *Methods Enzymol.* **194**, 398–405
- Bustin, S. A., Benes, V., Garson, J. A., Hellems, J., Huggett, J., Kubista, M., Mueller, R., Nolan, T., Pfaffl, M. W., Shipley, G. L. et al. (2009) The MIQE guidelines: minimum information for publication of quantitative real-time PCR experiments. *Clin. Chem.* **55**, 611–622

Received 25 September 2013/7 January 2014; accepted 16 January 2014  
Published as BJ Immediate Publication 16 January 2014, doi:10.1042/BJ20131273
